# Supplementary material
Source: PubMed Central journal article supplement (PMC7050005)
Supplement: supplementary_material_pkz029.pdf [file supplementary_material_pkz029.pdf]

## Further detail on the androgen/androgen metabolite measurement

We used stable isotope dilution high performance LC-MS/MS to quantify the androgens and androgen metabolites, as described in Trabert et al. (reference 12 in the manuscript). For the present analyses, we performed the LC-MS/MS analysis with updated instrumentation, a Thermo TSQ™ Quantiva triple quadrupole mass spectrometer (Thermo Fisher, San Jose, CA) coupled with a NexeraXR LC system (Shimadzu Scientific Instruments, Columbia, MD). Both the chromatographer and mass spectrometer were controlled by Xcalibur™ software (Thermo Fisher, San Jose, CA). Nine stable isotope labeled unconjugated and conjugated androgens were used to account for losses during sample preparation and analysis:

dehydroepiandrosterone-2,2,3,4,4-*d*<sub>5</sub>, dehydroepiandrosterone sulfate-2,2,3,4,4-*d*<sub>5</sub>, androstenedione-2,3,4-<sup>13</sup>C<sub>3</sub>, testosterone-2,3,4-<sup>13</sup>C<sub>3</sub>, dihydrotestosterone-16,16,17-*d*<sub>3</sub>, and dihydrotestosterone sulfate-16,16,17-*d*<sub>3</sub>, androsterone-2,2,4,4-*d*<sub>4</sub>, androsterone glucuronide-2,2,4,4-*d*<sub>4</sub>, obtained from Cerilliant Corporation (Round Rock, TX); and 5α-androstane-3α,17β-diol-17-glucuronide-16,16,17-*d*<sub>3</sub>, purchased from 13C Molecular, Inc. (Fayetteville, NC).

The limits of quantitation for the unconjugated androgens and conjugated androgens were: 0.01 ng/mL for androstenedione and testosterone; 0.05 ng/mL for DHEA, DHT, and ADT; 0.1 ng/mL for 5α-androstenedione; 0.05 ng/mL for DHEAS and DHTS; 0.1 ng/mL for 3α-diol-3G, 3α-diol-17G, ADT-G, and Etio-G. There were no samples in this study with undetectable levels for any of the hormones measured. Laboratory coefficients of variation of blinded duplicate samples within and across batches were <11.0% for all hormones measured. Intraclass correlation coefficients ranged from 0.77-0.997 with a mean of 0.94 (median 0.99).

**Supplemental Table 1. Odds ratios (OR) for endometrial cancer across quintiles (Q1-Q5) of circulating androgen/androgen metabolites**

| Hormone/Metabolite         | Median Concentration within quintile (nmol/L) | Overall Models |                |                      |                      |
|----------------------------|-----------------------------------------------|----------------|----------------|----------------------|----------------------|
|                            |                                               | Cases n=313    | Controls n=354 | Model 1 <sup>†</sup> | Model 2 <sup>†</sup> |
|                            | n(%)                                          | n(%)           | OR (95% CI)    | OR (95% CI)          |                      |
| <b>Parent Androgens</b>    |                                               |                |                |                      |                      |
| <b>DHEA</b>                |                                               |                |                |                      |                      |
| Q1                         | 2.1                                           | 47 (15.0)      | 70 (19.8)      | Reference            | Reference            |
| Q2                         | 3.6                                           | 58 (18.5)      | 70 (19.8)      | 1.44 (0.83 to 2.50)  | 1.36 (0.78 to 2.38)  |
| Q3                         | 5.0                                           | 68 (21.7)      | 71 (20.1)      | 1.58 (0.92 to 2.73)  | 1.54 (0.89 to 2.68)  |
| Q4                         | 6.8                                           | 61 (19.5)      | 70 (19.8)      | 1.42 (0.81 to 2.50)  | 1.37 (0.78 to 2.43)  |
| Q5                         | 10.7                                          | 74 (23.6)      | 71 (20.1)      | 1.85 (1.06 to 3.25)  | 1.67 (0.94 to 2.96)  |
| P trend <sup>‡</sup>       |                                               |                |                | 0.07                 | 0.15                 |
| <b>DHEAS</b>               |                                               |                |                |                      |                      |
| Q1                         | 422.3                                         | 51 (16.3)      | 70 (19.8)      | Reference            | Reference            |
| Q2                         | 764.2                                         | 57 (18.2)      | 70 (19.8)      | 1.02 (0.59 to 1.78)  | 0.95 (0.54 to 1.67)  |
| Q3                         | 1156.1                                        | 69 (22.0)      | 71 (20.1)      | 1.18 (0.69 to 2.00)  | 1.18 (0.69 to 2.03)  |
| Q4                         | 1659.9                                        | 54 (17.3)      | 70 (19.8)      | 0.95 (0.54 to 1.67)  | 0.90 (0.51 to 1.59)  |
| Q5                         | 2657.9                                        | 77 (24.6)      | 71 (20.1)      | 1.31 (0.76 to 2.26)  | 1.20 (0.69 to 2.09)  |
| P trend                    |                                               |                |                | 0.36                 | 0.53                 |
| <b>Androstenedione§</b>    |                                               |                |                |                      |                      |
| Q1                         | 0.7                                           | 34 (10.9)      | 70 (19.8)      | Reference            | Reference            |
| Q2                         | 1.0                                           | 64 (20.4)      | 70 (19.8)      | 1.94 (1.10 to 3.41)  | 1.81 (1.03 to 3.20)  |
| Q3                         | 1.3                                           | 62 (19.8)      | 70 (19.8)      | 1.71 (0.96 to 3.06)  | 1.56 (0.87 to 2.81)  |
| Q4                         | 1.7                                           | 70 (22.4)      | 71 (20.1)      | 2.15 (1.22 to 3.78)  | 1.90 (1.07 to 3.36)  |
| Q5                         | 2.3                                           | 78 (24.9)      | 71 (20.1)      | 2.36 (1.34 to 4.16)  | 2.01 (1.12 to 3.60)  |
| P trend                    |                                               |                |                | 0.01                 | 0.06                 |
| <b>Testosterone</b>        |                                               |                |                |                      |                      |
| Q1                         | 0.3                                           | 41 (13.1)      | 69 (19.5)      | Reference            | Reference            |
| Q2                         | 0.4                                           | 57 (18.2)      | 69 (19.5)      | 1.33 (0.77 to 2.30)  | 1.30 (0.75 to 2.25)  |
| Q3                         | 0.6                                           | 51 (16.3)      | 73 (20.6)      | 1.03 (0.59 to 1.82)  | 0.96 (0.54 to 1.71)  |
| Q4                         | 0.7                                           | 72 (23.0)      | 70 (19.8)      | 1.84 (1.06 to 3.19)  | 1.66 (0.95 to 2.90)  |
| Q5                         | 1.0                                           | 87 (27.8)      | 71 (20.1)      | 1.91 (1.12 to 3.24)  | 1.55 (0.89 to 2.69)  |
| P trend                    |                                               |                |                | 0.01                 | 0.08                 |
| <b>5α Pathway</b>          |                                               |                |                |                      |                      |
| <b>5α-Androstane-3-one</b> |                                               |                |                |                      |                      |
| Q1                         | 0.7                                           | 54 (17.3)      | 68 (19.2)      | Reference            | Reference            |
| Q2                         | 1.0                                           | 56 (17.9)      | 72 (20.3)      | 0.75 (0.44 to 1.28)  | 0.71 (0.42 to 1.22)  |
| Q3                         | 1.2                                           | 72 (23.0)      | 70 (19.8)      | 1.15 (0.68 to 1.93)  | 1.04 (0.62 to 1.77)  |
| Q4                         | 1.6                                           | 68 (21.7)      | 71 (20.1)      | 1.27 (0.75 to 2.13)  | 1.15 (0.68 to 1.94)  |
| Q5                         | 2.3                                           | 58 (18.5)      | 71 (20.1)      | 1.13 (0.66 to 1.92)  | 0.99 (0.57 to 1.71)  |
| P trend                    |                                               |                |                | 0.28                 | 0.54                 |
| <b>DHT</b>                 |                                               |                |                |                      |                      |
| Q1                         | 0.1                                           | 51 (16.3)      | 67 (18.9)      | Reference            | Reference            |
| Q2                         | 0.2                                           | 49 (15.7)      | 73 (20.6)      | 1.03 (0.59 to 1.79)  | 0.96 (0.55 to 1.68)  |
| Q3                         | 0.2                                           | 77 (24.6)      | 71 (20.1)      | 1.68 (0.99 to 2.85)  | 1.54 (0.90 to 2.62)  |
| Q4                         | 0.2                                           | 74 (23.6)      | 67 (18.9)      | 1.58 (0.93 to 2.70)  | 1.36 (0.79 to 2.35)  |
| Q5                         | 0.3                                           | 57 (18.2)      | 74 (20.9)      | 1.04 (0.61 to 1.78)  | 0.94 (0.55 to 1.62)  |
| P trend                    |                                               |                |                | 0.74                 | 0.93                 |

**DHTS**

|         |     |           |           |                     |                     |
|---------|-----|-----------|-----------|---------------------|---------------------|
| Q1      | 0.4 | 51 (16.3) | 69 (19.5) | Reference           | Reference           |
| Q2      | 0.8 | 67 (21.4) | 71 (20.1) | 1.12 (0.66 to 1.90) | 1.05 (0.61 to 1.79) |
| Q3      | 1.1 | 61 (19.5) | 70 (19.8) | 1.25 (0.73 to 2.14) | 1.23 (0.71 to 2.11) |
| Q4      | 1.6 | 54 (17.3) | 70 (19.8) | 0.99 (0.57 to 1.73) | 0.96 (0.55 to 1.68) |
| Q5      | 2.2 | 75 (24.0) | 72 (20.3) | 1.27 (0.75 to 2.17) | 1.18 (0.69 to 2.02) |
| P trend |     |           |           | 0.51                | 0.68                |

**ADT**

|         |     |           |           |                     |                     |
|---------|-----|-----------|-----------|---------------------|---------------------|
| Q1      | 0.4 | 58 (18.5) | 68 (19.2) | Reference           | Reference           |
| Q2      | 0.4 | 49 (15.7) | 72 (20.3) | 0.62 (0.36 to 1.07) | 0.63 (0.36 to 1.08) |
| Q3      | 0.5 | 60 (19.2) | 68 (19.2) | 0.85 (0.50 to 1.44) | 0.87 (0.51 to 1.49) |
| Q4      | 0.6 | 76 (24.3) | 73 (20.6) | 1.12 (0.67 to 1.88) | 1.04 (0.62 to 1.76) |
| Q5      | 0.9 | 65 (20.8) | 71 (20.1) | 0.93 (0.55 to 1.57) | 0.89 (0.52 to 1.52) |
| P trend |     |           |           | 0.48                | 0.67                |

**ADT-G**

|         |      |           |           |                     |                     |
|---------|------|-----------|-----------|---------------------|---------------------|
| Q1      | 6.9  | 36 (11.5) | 70 (19.8) | Reference           | Reference           |
| Q2      | 12.8 | 71 (22.7) | 70 (19.8) | 1.97 (1.12 to 3.46) | 1.94 (1.10 to 3.42) |
| Q3      | 19.7 | 50 (16.0) | 71 (20.1) | 1.31 (0.73 to 2.37) | 1.17 (0.64 to 2.13) |
| Q4      | 30.5 | 86 (27.5) | 70 (19.8) | 2.11 (1.20 to 3.71) | 1.91 (1.08 to 3.39) |
| Q5      | 53.0 | 65 (20.8) | 71 (20.1) | 1.34 (0.75 to 2.39) | 1.19 (0.66 to 2.15) |
| P trend |      |           |           | 0.88                | 0.80                |

**3 $\alpha$ -diol-3G**

|         |     |           |           |                     |                     |
|---------|-----|-----------|-----------|---------------------|---------------------|
| Q1      | 0.5 | 31 (9.9)  | 70 (19.8) | Reference           | Reference           |
| Q2      | 1.0 | 60 (19.2) | 70 (19.8) | 1.71 (0.96 to 3.05) | 1.54 (0.86 to 2.76) |
| Q3      | 1.4 | 87 (27.8) | 71 (20.1) | 2.48 (1.42 to 4.34) | 2.34 (1.33 to 4.11) |
| Q4      | 2.1 | 58 (18.5) | 70 (19.8) | 1.52 (0.84 to 2.74) | 1.37 (0.76 to 2.49) |
| Q5      | 3.7 | 72 (23.0) | 71 (20.1) | 1.62 (0.91 to 2.91) | 1.42 (0.78 to 2.56) |
| P trend |     |           |           | 0.77                | 0.93                |

**3 $\alpha$ -diol-17G**

|         |     |           |           |                     |                     |
|---------|-----|-----------|-----------|---------------------|---------------------|
| Q1      | 0.5 | 45 (14.4) | 69 (19.5) | Reference           | Reference           |
| Q2      | 0.8 | 63 (20.1) | 71 (20.1) | 1.29 (0.75 to 2.25) | 1.27 (0.73 to 2.22) |
| Q3      | 1.2 | 68 (21.7) | 71 (20.1) | 1.07 (0.62 to 1.83) | 1.02 (0.59 to 1.77) |
| Q4      | 1.8 | 57 (18.2) | 70 (19.8) | 0.89 (0.51 to 1.56) | 0.84 (0.47 to 1.48) |
| Q5      | 3.0 | 75 (24.0) | 71 (20.1) | 1.13 (0.65 to 1.98) | 1.04 (0.58 to 1.84) |
| P trend |     |           |           | 0.93                | 0.67                |

**Marker of Androgenic Activity (ADT-G + 3 $\alpha$ -diol-3G + 3 $\alpha$ -diol-17G)**

|         |      |           |           |                     |                     |
|---------|------|-----------|-----------|---------------------|---------------------|
| Q1      | 8.3  | 33 (10.5) | 70 (19.8) | Reference           | Reference           |
| Q2      | 14.9 | 76 (24.3) | 70 (19.8) | 2.22 (1.26 to 3.93) | 2.13 (1.20 to 3.77) |
| Q3      | 23.0 | 50 (16.0) | 71 (20.1) | 1.35 (0.74 to 2.46) | 1.24 (0.68 to 2.27) |
| Q4      | 34.5 | 82 (26.2) | 70 (19.8) | 2.16 (1.21 to 3.85) | 1.98 (1.10 to 3.54) |
| Q5      | 58.3 | 67 (21.4) | 71 (20.1) | 1.39 (0.77 to 2.52) | 1.23 (0.67 to 2.23) |
| P trend |      |           |           | 0.99                | 0.68                |

**5 $\beta$  Pathway****Etio-G**

|         |      |           |           |                     |                     |
|---------|------|-----------|-----------|---------------------|---------------------|
| Q1      | 12.3 | 50 (16.0) | 70 (19.8) | Reference           | Reference           |
| Q2      | 21.7 | 40 (12.8) | 70 (19.8) | 0.87 (0.49 to 1.54) | 0.86 (0.48 to 1.53) |
| Q3      | 33.6 | 77 (24.6) | 71 (20.1) | 1.54 (0.91 to 2.59) | 1.46 (0.86 to 2.47) |
| Q4      | 49.0 | 75 (24.0) | 70 (19.8) | 1.54 (0.90 to 2.61) | 1.44 (0.84 to 2.47) |
| Q5      | 89.7 | 66 (21.1) | 71 (20.1) | 1.23 (0.72 to 2.10) | 1.13 (0.66 to 1.95) |
| P trend |      |           |           | 0.36                | 0.57                |

**Parent Estrogens****Unconjugated Estradiol**

|         |      |            |           |                      |  |
|---------|------|------------|-----------|----------------------|--|
| Q1      | 4.0  | 17 (5.4)   | 70 (19.8) | Reference            |  |
| Q2      | 7.5  | 44 (14.1)  | 71 (20.1) | 2.75 (1.39 to 5.43)  |  |
| Q3      | 11.5 | 43 (13.7)  | 70 (19.8) | 2.26 (1.13 to 4.51)  |  |
| Q4      | 17.2 | 83 (26.5)  | 71 (20.1) | 4.48 (2.27 to 8.87)  |  |
| Q5      | 38.8 | 123 (39.3) | 71 (20.1) | 5.28 (2.64 to 10.59) |  |
| P trend |      |            |           | 0.0001               |  |

**Unconjugated Estrone**

|         |       |            |           |                     |  |
|---------|-------|------------|-----------|---------------------|--|
| Q1      | 29.9  | 32 (10.2)  | 70 (19.8) | Reference           |  |
| Q2      | 41.9  | 32 (10.2)  | 71 (20.1) | 0.91 (0.49 to 1.69) |  |
| Q3      | 55.2  | 61 (19.5)  | 70 (19.8) | 1.59 (0.90 to 2.81) |  |
| Q4      | 71.8  | 63 (20.1)  | 71 (20.1) | 1.62 (0.91 to 2.89) |  |
| Q5      | 115.9 | 122 (39.0) | 71 (20.1) | 2.63 (1.49 to 4.66) |  |
| P trend |       |            |           | 0.0001              |  |

**Ratios****5 $\alpha$ -Androstenedione:Androstenedione**

|         |      |           |           |                     |                     |
|---------|------|-----------|-----------|---------------------|---------------------|
| Q1      | 0.43 | 63 (20.1) | 70 (19.8) | Reference           | Reference           |
| Q2      | 0.68 | 70 (22.4) | 70 (19.8) | 0.97 (0.59 to 1.62) | 0.97 (0.58 to 1.63) |
| Q3      | 0.95 | 67 (21.4) | 71 (20.1) | 1.14 (0.69 to 1.90) | 1.17 (0.70 to 1.96) |
| Q4      | 1.33 | 59 (18.8) | 70 (19.8) | 1.02 (0.61 to 1.71) | 1.07 (0.64 to 1.81) |
| Q5      | 2.35 | 49 (15.7) | 71 (20.1) | 0.74 (0.43 to 1.27) | 0.79 (0.46 to 1.36) |
| P trend |      |           |           | 0.22                | 0.35                |

**Unconjugated Estrone:Androstenedione**

|         |      |            |           |                     |  |
|---------|------|------------|-----------|---------------------|--|
| Q1      | 23.4 | 28 (8.9)   | 70 (19.8) | Reference           |  |
| Q2      | 31.8 | 41 (13.1)  | 70 (19.8) | 1.19 (0.64 to 2.23) |  |
| Q3      | 41.1 | 74 (23.6)  | 71 (20.1) | 2.23 (1.24 to 4.01) |  |
| Q4      | 54.6 | 62 (19.8)  | 70 (19.8) | 1.50 (0.81 to 2.78) |  |
| Q5      | 97.8 | 102 (32.6) | 71 (20.1) | 2.18 (1.19 to 3.98) |  |
| P trend |      |            |           | 0.02                |  |

**DHT:Testosterone**

|         |     |           |           |                     |                     |
|---------|-----|-----------|-----------|---------------------|---------------------|
| Q1      | 0.2 | 91 (29.1) | 70 (19.8) | Reference           | Reference           |
| Q2      | 0.3 | 55 (17.6) | 70 (19.8) | 0.62 (0.37 to 1.04) | 0.59 (0.35 to 1.00) |
| Q3      | 0.3 | 56 (17.9) | 71 (20.1) | 0.67 (0.41 to 1.11) | 0.72 (0.43 to 1.20) |
| Q4      | 0.4 | 57 (18.2) | 70 (19.8) | 0.60 (0.36 to 1.01) | 0.65 (0.38 to 1.10) |
| Q5      | 0.6 | 49 (15.7) | 71 (20.1) | 0.52 (0.31 to 0.88) | 0.59 (0.35 to 1.01) |
| P trend |     |           |           | 0.02                | 0.10                |

**Unconjugated Estradiol:Testosterone§**

|         |      |            |           |                     |  |
|---------|------|------------|-----------|---------------------|--|
| Q1      | 7.1  | 30 (9.6)   | 70 (19.8) | Reference           |  |
| Q2      | 12.5 | 35 (11.2)  | 70 (19.8) | 1.23 (0.67 to 2.27) |  |
| Q3      | 18.3 | 50 (16.0)  | 71 (20.1) | 1.44 (0.79 to 2.63) |  |
| Q4      | 30.4 | 76 (24.3)  | 70 (19.8) | 1.84 (1.01 to 3.35) |  |
| Q5      | 67.2 | 116 (37.1) | 71 (20.1) | 2.56 (1.38 to 4.75) |  |
| P trend |      |            |           | 0.002               |  |

\*Models for each androgen/metabolite were adjusted for gravidity, smoking status, body mass index, duration of oral contraceptive use, and age at menarche (conditioned on matching factors)

†Adjusted for factors from model 1 plus estradiol. Results not shown for models in which unconjugated estrogens were exposures

‡P for trend across quintiles of a given hormone/metabolite

§Effect estimates comparing the 5th versus 1st quintile (from model 1) that were statistically significant using a Bonferroni correction threshold of  $p < 0.003$ .

**Supplemental Table 2. Odds ratios (OR) for endometrial cancer across quintiles (Q1-Q5) of circulating androgen/androgen metabolites: heterogeneity by tumor characteristics**

| Androgen/Metabolite       | Dualistic Model Type*                |                                      | P†   | Stage                                 |                                        | P†   | Grade‡                            |                                  | P†   |
|---------------------------|--------------------------------------|--------------------------------------|------|---------------------------------------|----------------------------------------|------|-----------------------------------|----------------------------------|------|
|                           | Type I<br>n=271 cases<br>OR (95% CI) | Type II<br>n=42 cases<br>OR (95% CI) |      | Stage 2<br>n=255 cases<br>OR (95% CI) | Stage 3/4<br>n=55 cases<br>OR (95% CI) |      | Grade 1/2<br>n=189<br>OR (95% CI) | Grade 3/4<br>n=65<br>OR (95% CI) |      |
| <b>Parent Androgens</b>   |                                      |                                      |      |                                       |                                        |      |                                   |                                  |      |
| <b>DHEA</b>               |                                      |                                      |      |                                       |                                        |      |                                   |                                  |      |
| Q1                        | Reference                            | Reference                            | 0.71 | Reference                             | Reference                              | 0.65 | Reference                         | Reference                        | 0.30 |
| Q2                        | 1.52 (0.85 to 2.70)                  | 0.97 (0.34 to 2.75)                  |      | 1.52 (0.85 to 2.71)                   | 1.12 (0.43 to 2.93)                    |      | 1.50 (0.79 to 2.85)               | 1.51 (0.57 to 3.97)              |      |
| Q3                        | 1.61 (0.91 to 2.83)                  | 0.89 (0.30 to 2.59)                  |      | 1.60 (0.90 to 2.84)                   | 1.15 (0.45 to 2.95)                    |      | 1.76 (0.95 to 3.28)               | 1.51 (0.58 to 3.92)              |      |
| Q4                        | 1.45 (0.80 to 2.60)                  | 1.07 (0.36 to 3.17)                  |      | 1.57 (0.87 to 2.83)                   | 0.74 (0.25 to 2.22)                    |      | 1.59 (0.84 to 3.02)               | 1.31 (0.48 to 3.60)              |      |
| Q5                        | 1.87 (1.04 to 3.35)                  | 1.47 (0.51 to 4.23)                  |      | 1.78 (0.98 to 3.21)                   | 1.93 (0.75 to 4.98)                    |      | 1.41 (0.73 to 2.73)               | 2.67 (1.04 to 6.85)              |      |
| P trend§                  | 0.09                                 | 0.43                                 |      | 0.12                                  | 0.21                                   |      | 0.57                              | 0.04                             |      |
| <b>DHEAS</b>              |                                      |                                      |      |                                       |                                        |      |                                   |                                  |      |
| Q1                        | Reference                            | Reference                            | 0.56 | Reference                             | Reference                              | 0.21 | Reference                         | Reference                        | 0.49 |
| Q2                        | 1.14 (0.64 to 2.01)                  | 0.72 (0.25 to 2.05)                  |      | 1.25 (0.71 to 2.21)                   | 0.47 (0.16 to 1.37)                    |      | 1.15 (0.62 to 2.14)               | 1.00 (0.37 to 2.72)              |      |
| Q3                        | 1.41 (0.81 to 2.45)                  | 0.75 (0.26 to 2.13)                  |      | 1.44 (0.83 to 2.53)                   | 0.76 (0.29 to 1.99)                    |      | 1.38 (0.75 to 2.52)               | 1.43 (0.56 to 3.66)              |      |
| Q4                        | 1.09 (0.61 to 1.95)                  | 0.59 (0.19 to 1.90)                  |      | 1.04 (0.58 to 1.88)                   | 0.92 (0.35 to 2.41)                    |      | 1.06 (0.56 to 2.00)               | 1.24 (0.47 to 3.29)              |      |
| Q5                        | 1.34 (0.75 to 2.37)                  | 1.52 (0.56 to 4.09)                  |      | 1.32 (0.74 to 2.37)                   | 1.47 (0.59 to 3.67)                    |      | 1.02 (0.54 to 1.95)               | 2.07 (0.82 to 5.26)              |      |
| P trend                   | 0.45                                 | 0.32                                 |      | 0.62                                  | 0.12                                   |      | 0.80                              | 0.08                             |      |
| <b>Androstenedione</b>    |                                      |                                      |      |                                       |                                        |      |                                   |                                  |      |
| Q1                        | Reference                            | Reference                            | 0.43 | Reference                             | Reference                              | 0.44 | Reference                         | Reference                        | 0.36 |
| Q2                        | 2.18 (1.18 to 4.01)                  | 1.11 (0.39 to 3.19)                  |      | 2.28 (1.23 to 4.22)                   | 1.21 (0.43 to 3.46)                    |      | 2.93 (1.45 to 5.93)               | 1.21 (0.44 to 3.38)              |      |
| Q3                        | 2.06 (1.11 to 3.82)                  | 1.36 (0.47 to 3.98)                  |      | 2.09 (1.12 to 3.92)                   | 1.63 (0.59 to 4.54)                    |      | 2.63 (1.29 to 5.39)               | 1.53 (0.56 to 4.18)              |      |
| Q4                        | 2.35 (1.28 to 4.32)                  | 1.33 (0.47 to 3.79)                  |      | 2.26 (1.21 to 4.19)                   | 2.18 (0.82 to 5.76)                    |      | 2.60 (1.27 to 5.32)               | 1.93 (0.74 to 5.03)              |      |
| Q5                        | 2.60 (1.42 to 4.77)                  | 1.10 (0.37 to 3.30)                  |      | 2.61 (1.42 to 4.82)                   | 1.35 (0.47 to 3.90)                    |      | 2.68 (1.32 to 5.47)               | 2.09 (0.80 to 5.42)              |      |
| P trend                   | 0.01                                 | 0.85                                 |      | 0.02                                  | 0.42                                   |      | 0.10                              | 0.07                             |      |
| <b>Testosterone</b>       |                                      |                                      |      |                                       |                                        |      |                                   |                                  |      |
| Q1                        | Reference                            | Reference                            | 0.16 | Reference                             | Reference                              | 0.01 | Reference                         | Reference                        | 0.89 |
| Q2                        | 1.16 (0.65 to 2.07)                  | 1.52 (0.41 to 5.58)                  |      | 1.04 (0.58 to 1.86)                   | 3.06 (0.93 to 10.10)                   |      | 1.17 (0.61 to 2.22)               | 1.27 (0.51 to 3.16)              |      |
| Q3                        | 0.82 (0.45 to 1.49)                  | 2.93 (0.86 to 9.97)                  |      | 0.76 (0.42 to 1.40)                   | 3.34 (1.01 to 11.00)                   |      | 0.90 (0.46 to 1.75)               | 0.64 (0.23 to 1.79)              |      |
| Q4                        | 1.44 (0.81 to 2.53)                  | 2.14 (0.61 to 7.50)                  |      | 1.45 (0.82 to 2.55)                   | 2.03 (0.58 to 7.17)                    |      | 1.42 (0.76 to 2.67)               | 1.22 (0.49 to 3.03)              |      |
| Q5                        | 1.74 (1.00 to 3.05)                  | 1.98 (0.56 to 6.94)                  |      | 1.79 (1.03 to 3.13)                   | 2.09 (0.60 to 7.26)                    |      | 1.78 (0.96 to 3.31)               | 1.35 (0.55 to 3.34)              |      |
| P trend                   | 0.02                                 | 0.38                                 |      | 0.01                                  | 0.91                                   |      | 0.03                              | 0.48                             |      |
| <b>5α Pathway</b>         |                                      |                                      |      |                                       |                                        |      |                                   |                                  |      |
| <b>5α-Androstenedione</b> |                                      |                                      |      |                                       |                                        |      |                                   |                                  |      |
| Q1                        | Reference                            | Reference                            | 0.70 | Reference                             | Reference                              | 0.40 | Reference                         | Reference                        | 0.12 |
| Q2                        | 0.68 (0.39 to 1.18)                  | 1.45 (0.39 to 5.32)                  |      | 0.75 (0.43 to 1.30)                   | 0.68 (0.22 to 2.13)                    |      | 0.81 (0.44 to 1.49)               | 0.51 (0.21 to 1.28)              |      |
| Q3                        | 0.94 (0.55 to 1.62)                  | 2.52 (0.75 to 8.43)                  |      | 0.95 (0.55 to 1.65)                   | 1.71 (0.63 to 4.64)                    |      | 0.80 (0.43 to 1.48)               | 1.16 (0.51 to 2.61)              |      |
| Q4                        | 1.27 (0.73 to 2.19)                  | 2.74 (0.80 to 9.40)                  |      | 1.21 (0.70 to 2.11)                   | 2.32 (0.85 to 6.28)                    |      | 1.35 (0.74 to 2.48)               | 1.04 (0.44 to 2.48)              |      |
| Q5                        | 1.08 (0.62 to 1.87)                  | 1.84 (0.50 to 6.71)                  |      | 1.13 (0.65 to 1.96)                   | 1.25 (0.42 to 3.76)                    |      | 1.31 (0.72 to 2.40)               | 0.56 (0.21 to 1.52)              |      |
| P trend                   | 0.25                                 | 0.38                                 |      | 0.27                                  | 0.30                                   |      | 0.11                              | 0.59                             |      |
| <b>DHT</b>                |                                      |                                      |      |                                       |                                        |      |                                   |                                  |      |
| Q1                        | Reference                            | Reference                            | 0.18 | Reference                             | Reference                              | 0.50 | Reference                         | Reference                        | 0.73 |
| Q2                        | 1.17 (0.66 to 2.08)                  | 0.11 (0.01 to 0.89)                  |      | 1.07 (0.60 to 1.92)                   | 0.64 (0.23 to 1.80)                    |      | 1.02 (0.54 to 1.92)               | 1.34 (0.53 to 3.38)              |      |
| Q3                        | 1.49 (0.86 to 2.58)                  | 1.50 (0.58 to 3.87)                  |      | 1.58 (0.91 to 2.74)                   | 1.21 (0.49 to 2.99)                    |      | 1.29 (0.70 to 2.38)               | 1.34 (0.54 to 3.37)              |      |
| Q4                        | 1.55 (0.89 to 2.70)                  | 0.86 (0.30 to 2.45)                  |      | 1.57 (0.90 to 2.76)                   | 0.74 (0.28 to 1.97)                    |      | 1.52 (0.83 to 2.79)               | 1.30 (0.51 to 3.30)              |      |
| Q5                        | 1.12 (0.63 to 1.99)                  | 1.09 (0.39 to 3.00)                  |      | 1.14 (0.64 to 2.03)                   | 1.05 (0.41 to 2.65)                    |      | 1.05 (0.56 to 1.97)               | 1.44 (0.57 to 3.64)              |      |
| P trend                   | 0.63                                 | 0.42                                 |      | 0.51                                  | 0.89                                   |      | 0.63                              | 0.55                             |      |

**DHTS**

|         |                     |                     |      |                     |                     |      |                     |                     |      |
|---------|---------------------|---------------------|------|---------------------|---------------------|------|---------------------|---------------------|------|
| Q1      | Reference           | Reference           | 0.76 | Reference           | Reference           | 0.58 | Reference           | Reference           | 0.87 |
| Q2      | 1.10 (0.63 to 1.93) | 1.10 (0.41 to 2.97) |      | 1.21 (0.69 to 2.13) | 0.66 (0.25 to 1.75) |      | 1.19 (0.65 to 2.18) | 1.01 (0.40 to 2.53) |      |
| Q3      | 1.22 (0.70 to 2.15) | 1.07 (0.39 to 2.96) |      | 1.32 (0.75 to 2.32) | 0.81 (0.31 to 2.12) |      | 1.15 (0.61 to 2.14) | 1.14 (0.45 to 2.88) |      |
| Q4      | 1.01 (0.56 to 1.80) | 0.62 (0.19 to 2.05) |      | 1.02 (0.57 to 1.84) | 0.61 (0.21 to 1.75) |      | 1.01 (0.53 to 1.90) | 0.83 (0.31 to 2.24) |      |
| Q5      | 1.21 (0.69 to 2.10) | 0.79 (0.27 to 2.35) |      | 1.12 (0.64 to 1.97) | 1.15 (0.47 to 2.82) |      | 1.01 (0.54 to 1.88) | 1.45 (0.61 to 3.45) |      |
| P trend | 0.64                | 0.45                |      | 0.97                | 0.60                |      | 0.76                | 0.41                |      |

**ADT**

|         |                     |                     |      |                     |                     |      |                     |                     |      |
|---------|---------------------|---------------------|------|---------------------|---------------------|------|---------------------|---------------------|------|
| Q1      | Reference           | Reference           | 0.84 | Reference           | Reference           | 0.99 | Reference           | Reference           | 0.34 |
| Q2      | 0.62 (0.35 to 1.10) | 0.49 (0.16 to 1.47) |      | 0.61 (0.34 to 1.08) | 0.49 (0.18 to 1.35) |      | 0.50 (0.26 to 0.94) | 1.06 (0.43 to 2.65) |      |
| Q3      | 0.86 (0.49 to 1.50) | 0.76 (0.27 to 2.11) |      | 0.88 (0.50 to 1.54) | 0.74 (0.28 to 1.95) |      | 0.87 (0.48 to 1.58) | 0.81 (0.30 to 2.16) |      |
| Q4      | 1.07 (0.63 to 1.83) | 0.63 (0.22 to 1.78) |      | 1.00 (0.58 to 1.73) | 0.97 (0.39 to 2.38) |      | 1.07 (0.60 to 1.91) | 1.04 (0.42 to 2.61) |      |
| Q5      | 0.85 (0.49 to 1.49) | 0.92 (0.33 to 2.51) |      | 0.90 (0.52 to 1.58) | 0.71 (0.26 to 1.91) |      | 0.67 (0.36 to 1.26) | 1.23 (0.49 to 3.09) |      |
| P trend | 0.74                | 0.79                |      | 0.61                | 0.997               |      | 0.84                | 0.62                |      |

**ADT-G**

|         |                     |                     |      |                     |                     |      |                     |                     |      |
|---------|---------------------|---------------------|------|---------------------|---------------------|------|---------------------|---------------------|------|
| Q1      | Reference           | Reference           | 0.57 | Reference           | Reference           | 0.36 | Reference           | Reference           | 0.35 |
| Q2      | 2.23 (1.22 to 4.05) | 1.14 (0.40 to 3.21) |      | 2.35 (1.28 to 4.31) | 1.14 (0.42 to 3.07) |      | 2.59 (1.29 to 5.19) | 1.56 (0.62 to 3.93) |      |
| Q3      | 1.61 (0.86 to 3.02) | 0.61 (0.17 to 2.19) |      | 1.62 (0.86 to 3.07) | 0.90 (0.31 to 2.61) |      | 2.15 (1.05 to 4.40) | 0.86 (0.31 to 2.43) |      |
| Q4      | 2.26 (1.25 to 4.06) | 1.62 (0.60 to 4.35) |      | 2.25 (1.23 to 4.10) | 1.79 (0.72 to 4.47) |      | 2.66 (1.35 to 5.24) | 1.60 (0.64 to 3.98) |      |
| Q5      | 1.48 (0.80 to 2.75) | 1.00 (0.33 to 3.08) |      | 1.70 (0.91 to 3.18) | 0.56 (0.18 to 1.75) |      | 1.77 (0.87 to 3.61) | 0.77 (0.28 to 2.14) |      |
| P trend | 0.84                | 0.80                |      | 0.55                | 0.45                |      | 0.71                | 0.47                |      |

**3 $\alpha$ -diol-3G**

|         |                     |                     |      |                     |                     |      |                     |                     |      |
|---------|---------------------|---------------------|------|---------------------|---------------------|------|---------------------|---------------------|------|
| Q1      | Reference           | Reference           | 0.83 | Reference           | Reference           | 0.86 | Reference           | Reference           | 0.96 |
| Q2      | 2.14 (1.14 to 4.01) | 1.34 (0.45 to 4.03) |      | 2.09 (1.12 to 3.91) | 1.61 (0.53 to 4.89) |      | 2.53 (1.23 to 5.18) | 1.71 (0.61 to 4.79) |      |
| Q3      | 3.03 (1.65 to 5.57) | 2.24 (0.80 to 6.28) |      | 2.97 (1.62 to 5.46) | 2.51 (0.87 to 7.25) |      | 3.45 (1.72 to 6.95) | 2.52 (0.94 to 6.71) |      |
| Q4      | 1.72 (0.92 to 3.24) | 1.09 (0.33 to 3.54) |      | 1.54 (0.81 to 2.90) | 1.97 (0.66 to 5.83) |      | 1.96 (0.95 to 4.04) | 1.46 (0.52 to 4.13) |      |
| Q5      | 2.02 (1.08 to 3.78) | 1.22 (0.39 to 3.88) |      | 1.92 (1.03 to 3.60) | 1.44 (0.46 to 4.47) |      | 2.20 (1.07 to 4.55) | 1.51 (0.54 to 4.22) |      |
| P trend | 0.57                | 0.87                |      | 0.68                | 0.93                |      | 0.65                | 0.99                |      |

**3 $\alpha$ -diol-17G**

|         |                     |                     |      |                     |                     |      |                     |                     |      |
|---------|---------------------|---------------------|------|---------------------|---------------------|------|---------------------|---------------------|------|
| Q1      | Reference           | Reference           | 0.84 | Reference           | Reference           | 0.73 | Reference           | Reference           | 0.91 |
| Q2      | 1.22 (0.69 to 2.17) | 0.87 (0.31 to 2.45) |      | 1.06 (0.60 to 1.89) | 1.48 (0.56 to 3.93) |      | 1.26 (0.66 to 2.39) | 1.10 (0.45 to 2.69) |      |
| Q3      | 1.14 (0.64 to 2.02) | 0.91 (0.32 to 2.59) |      | 1.10 (0.62 to 1.94) | 1.02 (0.36 to 2.89) |      | 1.23 (0.66 to 2.32) | 0.75 (0.29 to 1.94) |      |
| Q4      | 0.88 (0.49 to 1.60) | 0.56 (0.17 to 1.85) |      | 0.79 (0.44 to 1.44) | 0.98 (0.35 to 2.77) |      | 0.95 (0.49 to 1.83) | 0.75 (0.29 to 1.91) |      |
| Q5      | 1.02 (0.56 to 1.83) | 1.18 (0.42 to 3.36) |      | 1.04 (0.58 to 1.86) | 0.79 (0.27 to 2.35) |      | 0.98 (0.51 to 1.89) | 0.80 (0.31 to 2.06) |      |
| P trend | 0.63                | 0.74                |      | 0.88                | 0.37                |      | 0.52                | 0.53                |      |

**Marker of Androgenic Activity (ADT-G + 3 $\alpha$ -diol-3G + 3 $\alpha$ -diol-17G)**

|         |                     |                     |      |                     |                     |      |                     |                     |      |
|---------|---------------------|---------------------|------|---------------------|---------------------|------|---------------------|---------------------|------|
| Q1      | Reference           | Reference           | 0.59 | Reference           | Reference           | 0.17 | Reference           | Reference           | 0.69 |
| Q2      | 2.64 (1.43 to 4.84) | 1.17 (0.42 to 3.31) |      | 2.54 (1.38 to 4.68) | 1.46 (0.54 to 3.99) |      | 2.85 (1.41 to 5.72) | 2.26 (0.86 to 5.97) |      |
| Q3      | 1.68 (0.88 to 3.19) | 0.76 (0.23 to 2.55) |      | 1.63 (0.85 to 3.10) | 0.95 (0.32 to 2.86) |      | 2.02 (0.97 to 4.21) | 1.13 (0.38 to 3.31) |      |
| Q4      | 2.35 (1.28 to 4.31) | 1.49 (0.55 to 4.06) |      | 2.12 (1.15 to 3.91) | 2.13 (0.83 to 5.46) |      | 2.74 (1.38 to 5.47) | 1.79 (0.66 to 4.82) |      |
| Q5      | 1.63 (0.87 to 3.06) | 0.99 (0.32 to 3.05) |      | 1.79 (0.95 to 3.36) | 0.49 (0.14 to 1.68) |      | 1.78 (0.86 to 3.66) | 1.04 (0.36 to 3.02) |      |
| P trend | 0.88                | 0.93                |      | 0.58                | 0.32                |      | 0.80                | 0.52                |      |

**5 $\beta$  Pathway****Etio-G**

|         |                     |                     |      |                     |                     |      |                     |                     |      |
|---------|---------------------|---------------------|------|---------------------|---------------------|------|---------------------|---------------------|------|
| Q1      | Reference           | Reference           | 0.60 | Reference           | Reference           | 0.59 | Reference           | Reference           | 0.86 |
| Q2      | 0.88 (0.48 to 1.61) | 0.80 (0.26 to 2.52) |      | 0.98 (0.53 to 1.78) | 0.51 (0.16 to 1.64) |      | 0.96 (0.49 to 1.88) | 0.77 (0.28 to 2.11) |      |
| Q3      | 1.75 (1.01 to 3.03) | 1.44 (0.52 to 3.98) |      | 1.81 (1.04 to 3.16) | 1.51 (0.60 to 3.84) |      | 2.01 (1.09 to 3.68) | 1.43 (0.58 to 3.51) |      |
| Q4      | 1.79 (1.03 to 3.11) | 0.91 (0.29 to 2.83) |      | 1.67 (0.95 to 2.94) | 1.77 (0.71 to 4.41) |      | 1.82 (0.98 to 3.37) | 1.70 (0.72 to 4.04) |      |
| Q5      | 1.34 (0.76 to 2.36) | 1.71 (0.61 to 4.75) |      | 1.47 (0.83 to 2.59) | 1.02 (0.37 to 2.80) |      | 1.40 (0.74 to 2.63) | 1.15 (0.45 to 2.90) |      |
| P trend | 0.24                | 0.25                |      | 0.19                | 0.59                |      | 0.32                | 0.56                |      |

**Parent Estrogens**

**Unconjugated Estrone**

|         |                     |                     |      |                  |                  |      |                  |                  |      |
|---------|---------------------|---------------------|------|------------------|------------------|------|------------------|------------------|------|
| Q1      | Reference           | Reference           | 0.10 | Reference        | Reference        | 0.34 | Reference        | Reference        | 0.31 |
| Q2      | 0.89 (0.45 to 1.76) | 1.46 (0.50 to 4.26) |      | 0.99 (0.51–1.93) | 1.03 (0.33–3.17) |      | 0.87 (0.41–1.85) | 0.96 (0.29–3.20) |      |
| Q3      | 1.68 (0.91 to 3.10) | 1.18 (0.39 to 3.57) |      | 1.52 (0.82–2.83) | 1.63 (0.59–4.52) |      | 1.33 (0.67–2.64) | 2.58 (0.93–7.14) |      |
| Q4      | 1.69 (0.92 to 3.12) | 0.85 (0.26 to 2.75) |      | 1.75 (0.95–3.22) | 0.70 (0.22–2.30) |      | 1.55 (0.79–3.04) | 1.80 (0.63–5.16) |      |
| Q5      | 2.65 (1.45 to 4.82) | 1.30 (0.43 to 3.98) |      | 2.55 (1.39–4.66) | 1.77 (0.65–4.84) |      | 2.43 (1.26–4.70) | 2.25 (0.80–6.30) |      |
| P trend | 0.0001              | 0.86                |      | 0.0003           | 0.24             |      | 0.0004           | 0.15             |      |

**Unconjugated Estradiol**

|         |                      |                     |      |                      |                      |      |                      |                      |      |
|---------|----------------------|---------------------|------|----------------------|----------------------|------|----------------------|----------------------|------|
| Q1      | Reference            | Reference           | 0.01 | Reference            | Reference            | 0.12 | Reference            | Reference            | 0.36 |
| Q2      | 2.95 (1.38 to 6.28)  | 2.27 (0.72 to 7.21) |      | 2.68 (1.28 to 5.62)  | 2.90 (0.86 to 9.84)  |      | 3.97 (1.59 to 9.89)  | 1.85 (0.56 to 6.07)  |      |
| Q3      | 2.49 (1.15 to 5.39)  | 2.79 (0.87 to 8.98) |      | 2.66 (1.26 to 5.60)  | 1.62 (0.43 to 6.09)  |      | 2.86 (1.12 to 7.32)  | 1.80 (0.55 to 5.93)  |      |
| Q4      | 5.21 (2.49 to 10.87) | 1.34 (0.36 to 5.00) |      | 4.41 (2.13 to 9.13)  | 3.32 (0.99 to 11.17) |      | 5.76 (2.34 to 14.15) | 3.88 (1.30 to 11.63) |      |
| Q5      | 6.11 (2.88 to 12.97) | 1.45 (0.39 to 5.41) |      | 5.84 (2.78 to 12.28) | 1.90 (0.53 to 6.80)  |      | 7.54 (3.03 to 18.77) | 3.01 (0.96 to 9.47)  |      |
| P trend | <.0001               | 0.70                |      | <.0001               | 0.99                 |      | <.0001               | 0.13                 |      |

**Ratios**

**5α-Androstenedione:Androstenedione**

|         |                     |                     |      |                     |                     |      |                     |                     |      |
|---------|---------------------|---------------------|------|---------------------|---------------------|------|---------------------|---------------------|------|
| Q1      | Reference           | Reference           | 0.23 | Reference           | Reference           | 0.63 | Reference           | Reference           | 0.24 |
| Q2      | 0.87 (0.52 to 1.47) | 1.47 (0.45 to 4.80) |      | 0.80 (0.47 to 1.36) | 1.71 (0.63 to 4.64) |      | 0.92 (0.50 to 1.67) | 0.86 (0.39 to 1.87) |      |
| Q3      | 1.15 (0.67 to 1.95) | 1.82 (0.55 to 5.99) |      | 1.12 (0.66 to 1.91) | 1.77 (0.63 to 5.02) |      | 1.45 (0.80 to 2.62) | 0.74 (0.31 to 1.76) |      |
| Q4      | 0.95 (0.55 to 1.62) | 1.56 (0.48 to 5.11) |      | 0.94 (0.55 to 1.60) | 1.49 (0.52 to 4.27) |      | 1.27 (0.70 to 2.31) | 0.56 (0.23 to 1.38) |      |
| Q5      | 0.70 (0.40 to 1.23) | 2.14 (0.68 to 6.71) |      | 0.73 (0.41 to 1.29) | 1.37 (0.47 to 3.98) |      | 0.84 (0.44 to 1.61) | 0.51 (0.20 to 1.31) |      |
| P trend | 0.21                | 0.24                |      | 0.34                | 0.97                |      | 0.64                | 0.11                |      |

**Unconjugated Estrone:Androstenedione**

|         |                     |                     |      |                     |                     |      |                     |                     |      |
|---------|---------------------|---------------------|------|---------------------|---------------------|------|---------------------|---------------------|------|
| Q1      | Reference           | Reference           | 0.39 | Reference           | Reference           | 0.80 | Reference           | Reference           | 0.37 |
| Q2      | 1.44 (0.73 to 2.82) | 1.18 (0.36 to 3.87) |      | 1.50 (0.77 to 2.93) | 0.94 (0.29 to 3.10) |      | 1.81 (0.83 to 3.96) | 0.65 (0.19 to 2.27) |      |
| Q3      | 2.90 (1.54 to 5.44) | 1.25 (0.38 to 4.08) |      | 2.86 (1.53 to 5.37) | 1.49 (0.49 to 4.53) |      | 3.12 (1.49 to 6.53) | 3.17 (1.18 to 8.52) |      |
| Q4      | 1.67 (0.87 to 3.21) | 1.67 (0.54 to 5.20) |      | 1.70 (0.88 to 3.27) | 1.24 (0.41 to 3.81) |      | 1.75 (0.81 to 3.79) | 1.47 (0.51 to 4.23) |      |
| Q5      | 2.45 (1.30 to 4.63) | 1.30 (0.40 to 4.24) |      | 2.40 (1.27 to 4.55) | 1.40 (0.47 to 4.15) |      | 2.91 (1.38 to 6.12) | 1.50 (0.53 to 4.23) |      |
| P trend | 0.04                | 0.74                |      | 0.06                | 0.49                |      | 0.03                | 0.69                |      |

**DHT:Testosterone**

|         |                     |                     |      |                     |                     |      |                     |                     |      |
|---------|---------------------|---------------------|------|---------------------|---------------------|------|---------------------|---------------------|------|
| Q1      | Reference           | Reference           | 0.92 | Reference           | Reference           | 0.68 | Reference           | Reference           | 0.47 |
| Q2      | 0.62 (0.37 to 1.06) | 0.81 (0.29 to 2.24) |      | 0.67 (0.39 to 1.14) | 0.54 (0.21 to 1.40) |      | 0.65 (0.36 to 1.16) | 0.43 (0.17 to 1.09) |      |
| Q3      | 0.59 (0.35 to 0.99) | 0.93 (0.35 to 2.48) |      | 0.59 (0.34 to 1.00) | 0.74 (0.31 to 1.77) |      | 0.56 (0.31 to 1.01) | 0.70 (0.32 to 1.56) |      |
| Q4      | 0.64 (0.38 to 1.09) | 0.74 (0.26 to 2.14) |      | 0.68 (0.40 to 1.16) | 0.48 (0.18 to 1.30) |      | 0.69 (0.39 to 1.24) | 0.45 (0.18 to 1.14) |      |
| Q5      | 0.61 (0.36 to 1.05) | 0.66 (0.22 to 1.98) |      | 0.59 (0.34 to 1.01) | 0.74 (0.30 to 1.81) |      | 0.64 (0.35 to 1.15) | 0.79 (0.35 to 1.79) |      |
| P trend | 0.13                | 0.48                |      | 0.10                | 0.57                |      | 0.24                | 0.74                |      |

**Unconjugated Estradiol:Testosterone**

|         |                     |                     |      |                     |                     |      |                     |                      |      |
|---------|---------------------|---------------------|------|---------------------|---------------------|------|---------------------|----------------------|------|
| Q1      | Reference           | Reference           | 0.02 | Reference           | Reference           | 0.60 | Reference           | Reference            | 0.92 |
| Q2      | 1.61 (0.80 to 3.21) | 0.65 (0.22 to 1.92) |      | 1.42 (0.73 to 2.77) | 0.71 (0.21 to 2.36) |      | 1.28 (0.59 to 2.80) | 2.32 (0.67 to 8.11)  |      |
| Q3      | 1.81 (0.92 to 3.55) | 0.85 (0.31 to 2.32) |      | 1.60 (0.83 to 3.07) | 0.97 (0.33 to 2.84) |      | 1.70 (0.81 to 3.54) | 2.06 (0.58 to 7.33)  |      |
| Q4      | 2.62 (1.35 to 5.07) | 0.58 (0.19 to 1.74) |      | 2.14 (1.12 to 4.07) | 1.14 (0.41 to 3.20) |      | 2.25 (1.09 to 4.65) | 3.19 (0.95 to 10.77) |      |
| Q5      | 3.67 (1.87 to 7.19) | 0.55 (0.17 to 1.81) |      | 2.96 (1.53 to 5.74) | 1.21 (0.42 to 3.51) |      | 3.10 (1.48 to 6.47) | 4.58 (1.34 to 15.64) |      |
| P trend | 0.0002              | 0.37                |      | 0.001               | 0.50                |      | 0.002               | 0.01                 |      |

Unconditional logistic regression models for each androgen/metabolite were used and adjusted for gravidity, smoking status, body mass index, duration of oral contraceptive use, and age at menarche and additionally adjusted for matching factors: age at baseline, year of blood draw, race/ethnicity, time since last menopausal hormone therapy use

\*Using the "dualistic model" of endometrial cancer: Type I (adenocarcinomas, endometrioid carcinomas, mucinous tumors) and type II (serous, clear cell, other tumors).

†Chi-square P values from multinomial logistic regression models that treated the largest subgroup as the reference category and excluded non-cases

‡Limited to endometrioid tumor or adenocarcinoma cases

\$P for trend across quintiles of a given hormone/metabolite

**Supplemental Table 3. Odds ratios (OR) for endometrial cancer across quintiles (Q1-Q5) of circulating androgen/androgen metabolites: heterogeneity by time between blood draw and diagnosis**

| Androgen/Metabolite       | Time between blood draw and diagnosis  |                                  | P*   |
|---------------------------|----------------------------------------|----------------------------------|------|
|                           | <5 Years<br>n=116 cases<br>OR (95% CI) | ≥5<br>n=197 cases<br>OR (95% CI) |      |
| <b>DHEA</b>               |                                        |                                  |      |
| Q1                        | Reference                              | Reference                        | 0.27 |
| Q2                        | 1.50 (0.76–2.97)                       | 1.35 (0.70–2.60)                 |      |
| Q3                        | 1.01 (0.49–2.08)                       | 1.85 (0.99–3.47)                 |      |
| Q4                        | 1.08 (0.51–2.27)                       | 1.62 (0.84–3.10)                 |      |
| Q5                        | 1.49 (0.72–3.08)                       | 2.03 (1.06–3.87)                 |      |
| P trend <sup>†</sup>      | 0.47                                   | 0.05                             |      |
| <b>DHEAS</b>              |                                        |                                  |      |
| Q1                        | Reference                              | Reference                        | 0.18 |
| Q2                        | 1.50 (0.75–3.02)                       | 0.81 (0.42–1.53)                 |      |
| Q3                        | 1.46 (0.72–2.93)                       | 1.19 (0.65–2.18)                 |      |
| Q4                        | 0.82 (0.37–1.80)                       | 1.08 (0.58–2.02)                 |      |
| Q5                        | 1.30 (0.62–2.75)                       | 1.34 (0.73–2.48)                 |      |
| P trend                   | 0.95                                   | 0.18                             |      |
| <b>Androstenedione</b>    |                                        |                                  |      |
| Q1                        | Reference                              | Reference                        | 0.64 |
| Q2                        | 2.50 (1.11–5.62)                       | 1.64 (0.85–3.15)                 |      |
| Q3                        | 2.80 (1.24–6.30)                       | 1.46 (0.75–2.85)                 |      |
| Q4                        | 2.44 (1.07–5.54)                       | 1.93 (1.02–3.67)                 |      |
| Q5                        | 2.81 (1.25–6.34)                       | 1.99 (1.05–3.78)                 |      |
| P trend                   | 0.06                                   | 0.05                             |      |
| <b>Testosterone</b>       |                                        |                                  |      |
| Q1                        | Reference                              | Reference                        | 0.98 |
| Q2                        | 1.13 (0.53–2.41)                       | 1.26 (0.66–2.40)                 |      |
| Q3                        | 0.99 (0.46–2.15)                       | 0.99 (0.51–1.91)                 |      |
| Q4                        | 1.49 (0.72–3.11)                       | 1.52 (0.81–2.85)                 |      |
| Q5                        | 1.68 (0.82–3.46)                       | 1.82 (0.98–3.40)                 |      |
| P trend                   | 0.08                                   | 0.03                             |      |
| <b>5α Pathway</b>         |                                        |                                  |      |
| <b>5α-Androstenedione</b> |                                        |                                  |      |
| Q1                        | Reference                              | Reference                        | 0.37 |
| Q2                        | 0.73 (0.36–1.45)                       | 0.75 (0.40–1.43)                 |      |
| Q3                        | 0.88 (0.45–1.74)                       | 1.23 (0.67–2.26)                 |      |
| Q4                        | 0.95 (0.47–1.91)                       | 1.77 (0.96–3.27)                 |      |
| Q5                        | 0.81 (0.40–1.66)                       | 1.43 (0.77–2.65)                 |      |
| P trend                   | 0.82                                   | 0.05                             |      |
| <b>DHT</b>                |                                        |                                  |      |
| Q1                        | Reference                              | Reference                        | 0.28 |
| Q2                        | 1.02 (0.47–2.18)                       | 0.94 (0.50–1.77)                 |      |
| Q3                        | 1.24 (0.60–2.59)                       | 1.63 (0.91–2.92)                 |      |
| Q4                        | 1.84 (0.91–3.72)                       | 1.19 (0.65–2.20)                 |      |
| Q5                        | 1.38 (0.67–2.83)                       | 0.96 (0.51–1.80)                 |      |
| P trend                   | 0.17                                   | 0.91                             |      |



**DHTS**

|         |                  |                  |      |
|---------|------------------|------------------|------|
| Q1      | Reference        | Reference        | 0.20 |
| Q2      | 0.81 (0.40–1.66) | 1.34 (0.73–2.48) |      |
| Q3      | 0.90 (0.44–1.85) | 1.44 (0.77–2.67) |      |
| Q4      | 0.85 (0.41–1.78) | 1.02 (0.53–1.95) |      |
| Q5      | 1.28 (0.65–2.52) | 1.06 (0.57–1.99) |      |
| P trend | 0.32             | 0.66             |      |

**ADT**

|         |                  |                  |      |
|---------|------------------|------------------|------|
| Q1      | Reference        | Reference        | 0.40 |
| Q2      | 0.39 (0.18–0.84) | 0.76 (0.41–1.40) |      |
| Q3      | 0.80 (0.40–1.61) | 0.87 (0.47–1.61) |      |
| Q4      | 0.88 (0.45–1.71) | 1.08 (0.60–1.95) |      |
| Q5      | 0.90 (0.46–1.78) | 0.83 (0.45–1.54) |      |
| P trend | 0.42             | 0.91             |      |

**ADT-G**

|    |                  |                  |      |
|----|------------------|------------------|------|
| Q1 | Reference        | Reference        | 0.64 |
| Q2 | 2.67 (1.23–5.82) | 1.64 (0.86–3.12) |      |
| Q3 | 1.53 (0.65–3.58) | 1.32 (0.67–2.58) |      |
| Q4 | 2.78 (1.29–6.01) | 1.75 (0.94–3.29) |      |
| Q5 | 1.51 (0.65–3.49) | 1.28 (0.67–2.47) |      |
|    | 0.90             | 0.80             |      |

**3 $\alpha$ -diol-3G**

|         |                  |                  |      |
|---------|------------------|------------------|------|
| Q1      | Reference        | Reference        | 0.78 |
| Q2      | 1.94 (0.86–4.38) | 1.97 (1.00–3.89) |      |
| Q3      | 2.77 (1.27–6.05) | 2.84 (1.47–5.48) |      |
| Q4      | 1.73 (0.76–3.92) | 1.48 (0.74–2.95) |      |
| Q5      | 2.25 (1.01–5.00) | 1.62 (0.81–3.22) |      |
| P trend | 0.27             | 0.89             |      |

**3 $\alpha$ -diol-17G**

|         |                  |                  |      |
|---------|------------------|------------------|------|
| Q1      | Reference        | Reference        | 0.91 |
| Q2      | 1.01 (0.49–2.10) | 1.24 (0.66–2.33) |      |
| Q3      | 1.19 (0.58–2.42) | 1.03 (0.54–1.95) |      |
| Q4      | 0.74 (0.34–1.59) | 0.87 (0.45–1.68) |      |
| Q5      | 1.03 (0.49–2.16) | 1.03 (0.54–1.96) |      |
| P trend | 0.84             | 0.74             |      |

**5 $\beta$  Pathway****Etio-G**

|         |                  |                  |      |
|---------|------------------|------------------|------|
| Q1      | Reference        | Reference        | 0.39 |
| Q2      | 0.65 (0.29–1.47) | 1.01 (0.53–1.94) |      |
| Q3      | 1.99 (1.01–3.92) | 1.52 (0.83–2.80) |      |
| Q4      | 1.47 (0.72–2.98) | 1.74 (0.95–3.19) |      |
| Q5      | 1.26 (0.61–2.61) | 1.46 (0.79–2.70) |      |
| P trend | 0.42             | 0.18             |      |

**Marker of Androgenic Activity (ADT-G + 3 $\alpha$ -diol-3G + 3 $\alpha$ -diol-17G)**

|         |                  |                  |      |
|---------|------------------|------------------|------|
| Q1      | Reference        | Reference        | 0.44 |
| Q2      | 3.29 (1.50–7.24) | 1.78 (0.93–3.42) |      |
| Q3      | 1.41 (0.58–3.43) | 1.45 (0.74–2.86) |      |
| Q4      | 2.71 (1.22–6.01) | 1.82 (0.96–3.46) |      |
| Q5      | 1.73 (0.74–4.05) | 1.32 (0.68–2.59) |      |
| P trend | 0.93             | 0.89             |      |

**Parent Estrogens****Unconjugated Estrone**

|         |                  |                  |      |
|---------|------------------|------------------|------|
| Q1      | Reference        | Reference        | 0.53 |
| Q2      | 1.02 (0.44–2.34) | 0.98 (0.46–2.10) |      |
| Q3      | 1.14 (0.51–2.54) | 1.90 (0.97–3.75) |      |
| Q4      | 1.56 (0.73–3.36) | 1.51 (0.75–3.02) |      |
| Q5      | 1.95 (0.91–4.14) | 2.75 (1.41–5.36) |      |
| P trend | 0.03             | 0.001            |      |

**Unconjugated Estradiol**

|         |                   |                   |      |
|---------|-------------------|-------------------|------|
| Q1      | Reference         | Reference         | 0.92 |
| Q2      | 2.54 (0.98–6.62)  | 2.85 (1.26–6.47)  |      |
| Q3      | 2.03 (0.75–5.51)  | 2.75 (1.20–6.26)  |      |
| Q4      | 4.22 (1.66–10.74) | 4.13 (1.85–9.22)  |      |
| Q5      | 4.80 (1.85–12.47) | 4.93 (2.18–11.18) |      |
| P trend | 0.003             | 0.002             |      |

**Ratios****5 $\alpha$ -Androstenedione:Androstenedione**

|         |                  |                  |      |
|---------|------------------|------------------|------|
| Q1      | Reference        | Reference        | 0.38 |
| Q2      | 0.67 (0.34–1.33) | 1.11 (0.62–1.98) |      |
| Q3      | 1.15 (0.60–2.22) | 1.21 (0.66–2.21) |      |
| Q4      | 0.79 (0.40–1.57) | 1.15 (0.63–2.09) |      |
| Q5      | 0.56 (0.27–1.17) | 1.05 (0.56–1.95) |      |
| P trend | 0.16             | 0.99             |      |

**Unconjugated Estrone:Androstenedione**

|         |                  |                  |      |
|---------|------------------|------------------|------|
| Q1      | Reference        | Reference        | 0.71 |
| Q2      | 1.08 (0.46–2.50) | 1.64 (0.77–3.50) |      |
| Q3      | 1.87 (0.85–4.09) | 3.16 (1.55–6.43) |      |
| Q4      | 1.10 (0.48–2.52) | 2.13 (1.02–4.44) |      |
| Q5      | 1.65 (0.75–3.62) | 2.72 (1.33–5.57) |      |
| P trend | 0.24             | 0.06             |      |

**DHT:Testosterone**

|         |                  |                  |      |
|---------|------------------|------------------|------|
| Q1      | Reference        | Reference        | 0.64 |
| Q2      | 0.68 (0.35–1.32) | 0.63 (0.35–1.12) |      |
| Q3      | 0.52 (0.26–1.04) | 0.69 (0.40–1.22) |      |
| Q4      | 0.65 (0.33–1.29) | 0.66 (0.37–1.18) |      |
| Q5      | 0.75 (0.39–1.46) | 0.54 (0.30–0.99) |      |
| P trend | 0.52             | 0.09             |      |

**Unconjugated Estradiol:Testosterone**

|         |                  |                  |      |
|---------|------------------|------------------|------|
| Q1      | Reference        | Reference        | 0.43 |
| Q2      | 1.81 (0.75–4.36) | 0.97 (0.46–2.03) |      |
| Q3      | 1.41 (0.57–3.47) | 1.43 (0.72–2.83) |      |
| Q4      | 2.38 (1.01–5.57) | 1.64 (0.83–3.25) |      |
| Q5      | 3.45 (1.45–8.22) | 2.16 (1.08–4.35) |      |
| P trend | 0.003            | 0.02             |      |

Unconditional logistic regression models for each androgen/metabolite were used and adjusted for gravidity, smoking status, body mass index, duration of oral contraceptive use, and age at menarche and additionally adjusted for matching factors: age at baseline, year of blood draw, race/ethnicity, time since last menopausal hormone therapy use

\*Chi-square P values from multinomial logistic regression models that treated the largest subgroup as the reference category and excluded non-cases

†P for trend across quintiles of a given hormone/metabolite

**Supplemental Table 4. Odds ratios (OR) for endometrial cancer across quintiles (Q1-Q5) of circulating androgen/androgen metabolites: modification by age at blood draw and body mass index (BMI)**

| Androgen/Metabolite       | Age                    |                     | P*    | BMI (kg/m <sup>2</sup> ) |                     |                     | P*    |
|---------------------------|------------------------|---------------------|-------|--------------------------|---------------------|---------------------|-------|
|                           | <60 years<br>n=192     | ≥60 Years<br>n=475  |       | <25<br>n=235             | 25 to 29.9<br>n=194 | ≥30<br>n=236        |       |
|                           | OR (95% CI)            | OR (95% CI)         |       | OR (95% CI)              | OR (95% CI)         | OR (95% CI)         |       |
| <b>Parent Androgens</b>   |                        |                     |       |                          |                     |                     |       |
| <b>DHEA</b>               |                        |                     |       |                          |                     |                     |       |
| Q1                        | Reference              | Reference           | 0.29  | Reference                | Reference           | Reference           | 0.001 |
| Q2                        | 10.92 (1.11 to 107.58) | 1.27 (0.70 to 2.29) |       | 3.13 (0.95 to 10.35)     | 1.67 (0.62 to 4.50) | 0.62 (0.22 to 1.77) |       |
| Q3                        | 10.27 (1.09 to 96.48)  | 1.40 (0.77 to 2.55) |       | 4.52 (1.35 to 15.08)     | 1.59 (0.56 to 4.51) | 0.67 (0.26 to 1.72) |       |
| Q4                        | 17.06 (1.87 to 155.84) | 1.03 (0.54 to 1.96) |       | 14.55 (4.09 to 51.80)    | 1.19 (0.42 to 3.36) | 0.31 (0.11 to 0.82) |       |
| Q5                        | 15.14 (1.73 to 132.36) | 1.61 (0.82 to 3.15) |       | 5.52 (1.65 to 18.46)     | 1.51 (0.52 to 4.44) | 1.02 (0.37 to 2.78) |       |
| P trend <sup>†</sup>      | 0.04                   | 0.30                |       | 0.01                     | 0.79                | 0.84                |       |
| <b>DHEAS</b>              |                        |                     |       |                          |                     |                     |       |
| Q1                        | Reference              | Reference           | 0.41  | Reference                | Reference           | Reference           | 0.07  |
| Q2                        | 2.48 (0.48 to 12.85)   | 1.06 (0.59 to 1.92) |       | 2.06 (0.76 to 5.61)      | 1.41 (0.51 to 3.91) | 0.33 (0.11 to 0.97) |       |
| Q3                        | 6.01 (1.21 to 29.96)   | 1.10 (0.61 to 1.98) |       | 2.62 (0.96 to 7.17)      | 0.97 (0.37 to 2.52) | 0.72 (0.25 to 2.11) |       |
| Q4                        | 4.62 (0.98 to 21.89)   | 0.78 (0.41 to 1.48) |       | 2.93 (1.01 to 8.53)      | 1.42 (0.53 to 3.83) | 0.25 (0.08 to 0.76) |       |
| Q5                        | 4.33 (0.99 to 18.87)   | 1.26 (0.65 to 2.44) |       | 3.39 (1.20 to 9.59)      | 1.01 (0.36 to 2.82) | 0.51 (0.18 to 1.48) |       |
| P trend                   | 0.17                   | 0.72                |       | 0.03                     | 0.90                | 0.53                |       |
| <b>Androstenedione</b>    |                        |                     |       |                          |                     |                     |       |
| Q1                        | Reference              | Reference           | 0.93  | Reference                | Reference           | Reference           | 0.56  |
| Q2                        | 3.80 (0.63 to 22.83)   | 1.77 (0.95 to 3.30) |       | 2.59 (0.93 to 7.20)      | 1.69 (0.61 to 4.67) | 1.11 (0.38 to 3.28) |       |
| Q3                        | 3.33 (0.60 to 18.56)   | 1.83 (0.93 to 3.60) |       | 2.02 (0.63 to 6.47)      | 2.57 (0.92 to 7.20) | 1.13 (0.40 to 3.15) |       |
| Q4                        | 3.82 (0.65 to 22.43)   | 2.11 (1.13 to 3.95) |       | 4.79 (1.70 to 13.47)     | 1.71 (0.58 to 4.99) | 1.22 (0.45 to 3.32) |       |
| Q5                        | 4.20 (0.75 to 23.67)   | 2.16 (1.14 to 4.08) |       | 3.01 (1.05 to 8.63)      | 2.18 (0.77 to 6.21) | 2.19 (0.78 to 6.13) |       |
| P trend                   | 0.29                   | 0.03                |       | 0.04                     | 0.28                | 0.08                |       |
| <b>Testosterone</b>       |                        |                     |       |                          |                     |                     |       |
| Q1                        | Reference              | Reference           | 0.17  | Reference                | Reference           | Reference           | 0.09  |
| Q2                        | 1.56 (0.52 to 4.67)    | 1.16 (0.60 to 2.27) |       | 2.45 (0.82 to 7.26)      | 0.77 (0.28 to 2.09) | 0.86 (0.29 to 2.49) |       |
| Q3                        | 1.21 (0.44 to 3.36)    | 0.85 (0.42 to 1.74) |       | 2.93 (0.93 to 9.24)      | 1.14 (0.42 to 3.12) | 0.33 (0.12 to 0.91) |       |
| Q4                        | 1.03 (0.37 to 2.85)    | 1.77 (0.91 to 3.44) |       | 3.57 (1.24 to 10.32)     | 0.96 (0.35 to 2.64) | 0.90 (0.32 to 2.51) |       |
| Q5                        | 0.76 (0.24 to 2.34)    | 2.37 (1.25 to 4.46) |       | 4.87 (1.67 to 14.24)     | 0.97 (0.37 to 2.54) | 1.15 (0.42 to 3.19) |       |
| P trend                   | 0.36                   | 0.001               |       | 0.005                    | 0.87                | 0.28                |       |
| <b>5α Pathway</b>         |                        |                     |       |                          |                     |                     |       |
| <b>5α-Androstanedione</b> |                        |                     |       |                          |                     |                     |       |
| Q1                        | Reference              | Reference           | 0.998 | Reference                | Reference           | Reference           | 0.03  |
| Q2                        | 0.65 (0.24 to 1.77)    | 0.76 (0.40 to 1.47) |       | 2.41 (0.85 to 6.86)      | 0.96 (0.35 to 2.63) | 0.25 (0.09 to 0.67) |       |
| Q3                        | 1.02 (0.39 to 2.65)    | 1.10 (0.58 to 2.08) |       | 2.84 (1.00 to 8.12)      | 0.68 (0.26 to 1.79) | 0.81 (0.31 to 2.15) |       |
| Q4                        | 1.48 (0.56 to 3.92)    | 1.35 (0.71 to 2.58) |       | 5.44 (1.94 to 15.26)     | 0.98 (0.38 to 2.53) | 0.55 (0.20 to 1.50) |       |
| Q5                        | 0.92 (0.34 to 2.50)    | 1.15 (0.60 to 2.20) |       | 1.90 (0.67 to 5.39)      | 1.31 (0.51 to 3.38) | 0.98 (0.34 to 2.83) |       |
| P trend                   | 0.72                   | 0.30                |       | 0.27                     | 0.42                | 0.28                |       |
| <b>DHT</b>                |                        |                     |       |                          |                     |                     |       |
| Q1                        | Reference              | Reference           | 0.94  | Reference                | Reference           | Reference           | 0.04  |
| Q2                        | 1.40 (0.42 to 4.72)    | 0.91 (0.48 to 1.71) |       | 1.30 (0.40 to 4.25)      | 0.79 (0.28 to 2.21) | 1.06 (0.40 to 2.80) |       |
| Q3                        | 2.31 (0.78 to 6.83)    | 1.33 (0.72 to 2.46) |       | 3.79 (1.24 to 11.60)     | 1.12 (0.46 to 2.72) | 1.09 (0.43 to 2.74) |       |
| Q4                        | 1.89 (0.63 to 5.69)    | 1.42 (0.75 to 2.67) |       | 1.60 (0.50 to 5.07)      | 1.52 (0.59 to 3.96) | 1.50 (0.58 to 3.88) |       |
| Q5                        | 1.39 (0.45 to 4.25)    | 1.03 (0.54 to 1.95) |       | 3.36 (1.05 to 10.75)     | 0.78 (0.31 to 1.92) | 0.56 (0.21 to 1.46) |       |
| P trend                   | 0.78                   | 0.62                |       | 0.07                     | 0.87                | 0.31                |       |

|                                                                                                             |                       |                     |      |                      |                      |                      |      |
|-------------------------------------------------------------------------------------------------------------|-----------------------|---------------------|------|----------------------|----------------------|----------------------|------|
| <b>DHTS</b>                                                                                                 |                       |                     |      |                      |                      |                      |      |
| Q1                                                                                                          | Reference             | Reference           | 0.31 | Reference            | Reference            | Reference            | 0.34 |
| Q2                                                                                                          | 0.42 (0.12 to 1.49)   | 1.43 (0.78 to 2.62) |      | 2.05 (0.74 to 5.66)  | 0.54 (0.21 to 1.41)  | 1.62 (0.59 to 4.48)  |      |
| Q3                                                                                                          | 1.07 (0.34 to 3.43)   | 1.22 (0.66 to 2.25) |      | 2.26 (0.81 to 6.32)  | 0.97 (0.38 to 2.46)  | 0.95 (0.34 to 2.65)  |      |
| Q4                                                                                                          | 0.73 (0.25 to 2.14)   | 1.10 (0.56 to 2.17) |      | 2.22 (0.78 to 6.31)  | 0.52 (0.19 to 1.40)  | 0.80 (0.29 to 2.20)  |      |
| Q5                                                                                                          | 1.27 (0.44 to 3.69)   | 1.15 (0.44 to 2.16) |      | 2.87 (0.99 to 8.31)  | 0.65 (0.24 to 1.73)  | 0.93 (0.37 to 2.37)  |      |
| P trend                                                                                                     | 0.30                  | 0.95                |      | 0.09                 | 0.42                 | 0.43                 |      |
| <b>ADT</b>                                                                                                  |                       |                     |      |                      |                      |                      |      |
| Q1                                                                                                          | Reference             | Reference           | 0.71 | Reference            | Reference            | Reference            | 0.73 |
| Q2                                                                                                          | 0.83 (0.27 to 2.57)   | 0.55 (0.30 to 1.04) |      | 0.49 (0.18 to 1.33)  | 0.36 (0.13 to 1.00)  | 0.77 (0.29 to 2.06)  |      |
| Q3                                                                                                          | 1.67 (0.56 to 4.93)   | 0.67 (0.35 to 1.26) |      | 1.22 (0.47 to 3.14)  | 0.74 (0.28 to 1.98)  | 0.75 (0.28 to 1.98)  |      |
| Q4                                                                                                          | 1.48 (0.54 to 4.04)   | 0.89 (0.48 to 1.65) |      | 0.79 (0.32 to 1.96)  | 0.82 (0.32 to 2.11)  | 1.46 (0.55 to 3.87)  |      |
| Q5                                                                                                          | 1.20 (0.43 to 3.35)   | 0.77 (0.41 to 1.46) |      | 0.62 (0.23 to 1.63)  | 0.83 (0.31 to 2.17)  | 0.83 (0.31 to 2.19)  |      |
| P trend                                                                                                     | 0.66                  | 0.92                |      | 0.51                 | 0.62                 | 0.88                 |      |
| <b>ADT-G</b>                                                                                                |                       |                     |      |                      |                      |                      |      |
| Q1                                                                                                          | Reference             | Reference           | 0.48 | Reference            | Reference            | Reference            | 0.73 |
| Q2                                                                                                          | 3.12 (0.62 to 15.59)  | 2.02 (1.10 to 3.71) |      | 2.00 (0.76 to 5.26)  | 2.28 (0.80 to 6.53)  | 1.92 (0.63 to 5.83)  |      |
| Q3                                                                                                          | 3.44 (0.70 to 16.82)  | 1.32 (0.68 to 2.56) |      | 2.20 (0.74 to 6.56)  | 1.01 (0.35 to 2.87)  | 0.98 (0.33 to 2.94)  |      |
| Q4                                                                                                          | 6.89 (1.54 to 30.80)  | 1.63 (0.88 to 3.04) |      | 3.77 (1.34 to 10.60) | 1.98 (0.73 to 5.36)  | 1.10 (0.40 to 3.05)  |      |
| Q5                                                                                                          | 3.21 (0.73 to 14.09)  | 1.26 (0.64 to 2.49) |      | 2.06 (0.65 to 6.56)  | 1.40 (0.49 to 4.01)  | 0.99 (0.36 to 2.71)  |      |
| P trend                                                                                                     | 0.52                  | 0.95                |      | 0.19                 | 0.87                 | 0.46                 |      |
| <b>3<math>\alpha</math>-diol-3G</b>                                                                         |                       |                     |      |                      |                      |                      |      |
| Q1                                                                                                          | Reference             | Reference           | 0.40 | Reference            | Reference            | Reference            | 0.56 |
| Q2                                                                                                          | 8.17 (1.41 to 47.38)  | 1.70 (0.89 to 3.24) |      | 3.39 (1.27 to 9.05)  | 0.96 (0.34 to 2.71)  | 2.41 (0.72 to 8.08)  |      |
| Q3                                                                                                          | 11.43 (2.06 to 63.34) | 2.37 (1.26 to 4.45) |      | 4.39 (1.65 to 11.70) | 1.10 (0.41 to 2.97)  | 4.91 (1.46 to 16.48) |      |
| Q4                                                                                                          | 6.85 (1.31 to 35.93)  | 1.22 (0.62 to 2.43) |      | 2.44 (0.85 to 7.05)  | 1.16 (0.42 to 3.24)  | 1.28 (0.40 to 4.10)  |      |
| Q5                                                                                                          | 10.76 (2.01 to 57.57) | 1.29 (0.65 to 2.54) |      | 2.26 (0.78 to 6.62)  | 0.86 (0.28 to 2.59)  | 2.37 (0.78 to 7.24)  |      |
| P trend                                                                                                     | 0.11                  | 0.69                |      | 0.50                 | 0.81                 | 0.91                 |      |
| <b>3<math>\alpha</math>-diol-17G</b>                                                                        |                       |                     |      |                      |                      |                      |      |
| Q1                                                                                                          | Reference             | Reference           | 0.96 | Reference            | Reference            | Reference            | 0.55 |
| Q2                                                                                                          | 2.15 (0.57 to 8.10)   | 1.05 (0.57 to 1.94) |      | 1.62 (0.70 to 3.77)  | 1.20 (0.43 to 3.33)  | 0.42 (0.11 to 1.58)  |      |
| Q3                                                                                                          | 1.52 (0.43 to 5.46)   | 1.06 (0.57 to 1.97) |      | 1.19 (0.47 to 3.03)  | 0.90 (0.34 to 2.35)  | 0.56 (0.16 to 1.98)  |      |
| Q4                                                                                                          | 1.30 (0.37 to 4.58)   | 0.78 (0.40 to 1.52) |      | 1.08 (0.38 to 3.12)  | 0.46 (0.17 to 1.26)  | 0.57 (0.16 to 2.05)  |      |
| Q5                                                                                                          | 1.55 (0.46 to 5.21)   | 0.99 (0.51 to 1.93) |      | 1.46 (0.52 to 4.07)  | 0.81 (0.29 to 2.23)  | 0.63 (0.18 to 2.17)  |      |
| P trend                                                                                                     | 0.94                  | 0.74                |      | 0.73                 | 0.31                 | 0.82                 |      |
| <b>Marker of Androgenic Activity (ADT-G + 3<math>\alpha</math>-diol-3G + 3<math>\alpha</math>-diol-17G)</b> |                       |                     |      |                      |                      |                      |      |
| Q1                                                                                                          | Reference             | Reference           | 0.55 | Reference            | Reference            | Reference            | 0.63 |
| Q2                                                                                                          | 3.39 (0.68 to 16.92)  | 2.40 (1.29 to 4.46) |      | 2.14 (0.82 to 5.57)  | 2.71 (0.95 to 7.76)  | 2.18 (0.71 to 6.70)  |      |
| Q3                                                                                                          | 3.25 (0.65 to 16.17)  | 1.41 (0.72 to 2.77) |      | 2.23 (0.74 to 6.67)  | 0.95 (0.33 to 2.71)  | 1.42 (0.45 to 4.49)  |      |
| Q4                                                                                                          | 6.13 (1.35 to 27.76)  | 1.69 (0.90 to 3.19) |      | 3.60 (1.28 to 10.18) | 2.15 (0.80 to 5.83)  | 1.17 (0.41 to 3.36)  |      |
| Q5                                                                                                          | 3.00 (0.67 to 13.36)  | 1.40 (0.71 to 2.80) |      | 1.70 (0.52 to 5.55)  | 1.35 (0.47 to 3.90)  | 1.28 (0.45 to 3.62)  |      |
| P trend                                                                                                     | 0.65                  | 0.94                |      | 0.37                 | 0.998                | 0.61                 |      |
| <b>5<math>\beta</math> Pathway</b>                                                                          |                       |                     |      |                      |                      |                      |      |
| <b>Etio-G</b>                                                                                               |                       |                     |      |                      |                      |                      |      |
| Q1                                                                                                          | Reference             | Reference           | 0.44 | Reference            | Reference            | Reference            | 0.20 |
| Q2                                                                                                          | 1.21 (0.32 to 4.63)   | 0.83 (0.44 to 1.59) |      | 1.39 (0.47 to 4.07)  | 1.07 (0.38 to 3.05)  | 0.63 (0.21 to 1.86)  |      |
| Q3                                                                                                          | 4.40 (1.32 to 14.73)  | 1.40 (0.77 to 2.56) |      | 3.59 (1.33 to 9.67)  | 2.57 (0.89 to 7.43)  | 0.75 (0.30 to 1.86)  |      |
| Q4                                                                                                          | 4.98 (1.51 to 16.45)  | 1.24 (0.67 to 2.32) |      | 3.66 (1.27 to 10.52) | 1.90 (0.70 to 5.22)  | 1.01 (0.39 to 2.63)  |      |
| Q5                                                                                                          | 2.70 (0.87 to 8.42)   | 1.27 (0.67 to 2.40) |      | 2.06 (0.73 to 5.82)  | 3.41 (1.14 to 10.20) | 0.59 (0.24 to 1.46)  |      |
| P trend                                                                                                     | 0.23                  | 0.34                |      | 0.25                 | 0.02                 | 0.38                 |      |

**Parent Estrogens****Unconjugated Estrone**

|         |                     |                     |      |                     |                     |                      |      |
|---------|---------------------|---------------------|------|---------------------|---------------------|----------------------|------|
| Q1      | Reference           | Reference           | 0.58 | Reference           | Reference           | Reference            | 0.50 |
| Q2      | 1.31 (0.38 to 4.55) | 0.95 (0.46 to 1.95) |      | 1.05 (0.40 to 2.74) | 0.91 (0.32 to 2.57) | 2.01 (0.36 to 11.24) |      |
| Q3      | 1.46 (0.46 to 4.65) | 1.73 (0.88 to 3.38) |      | 1.45 (0.60 to 3.49) | 0.89 (0.31 to 2.59) | 3.97 (0.95 to 16.69) |      |
| Q4      | 1.39 (0.41 to 4.77) | 1.77 (0.91 to 3.45) |      | 2.17 (0.84 to 5.62) | 1.44 (0.52 to 4.01) | 1.64 (0.41 to 6.63)  |      |
| Q5      | 1.84 (0.57 to 5.92) | 3.02 (1.55 to 5.88) |      | 3.34 (1.22 to 9.16) | 1.30 (0.47 to 3.60) | 4.45 (1.17 to 16.95) |      |
| P trend | 0.32                | 0.0002              |      | 0.01                | 0.38                | 0.03                 |      |

**Unconjugated Estradiol**

|         |                      |                      |      |                      |                     |                      |      |
|---------|----------------------|----------------------|------|----------------------|---------------------|----------------------|------|
| Q1      | Reference            | Reference            | 0.60 | Reference            | Reference           | Reference            | 0.98 |
| Q2      | 3.09 (0.69 to 13.78) | 2.77 (1.29 to 5.94)  |      | 3.90 (1.55 to 9.81)  | 1.34 (0.38 to 4.73) | 2.47 (0.27 to 22.19) |      |
| Q3      | 3.57 (0.74 to 17.35) | 2.39 (1.10 to 5.18)  |      | 3.38 (1.24 to 9.20)  | 1.22 (0.35 to 4.22) | 2.22 (0.31 to 15.83) |      |
| Q4      | 6.43 (1.42 to 29.19) | 3.88 (1.83 to 8.22)  |      | 4.37 (1.49 to 12.85) | 2.01 (0.61 to 6.56) | 5.03 (0.76 to 33.26) |      |
| Q5      | 4.82 (1.05 to 22.04) | 5.87 (2.67 to 12.87) |      | 7.26 (2.17 to 24.30) | 2.56 (0.73 to 9.05) | 5.08 (0.81 to 31.96) |      |
| P trend | 0.32                 | <.0001               |      | 0.01                 | 0.08                | 0.07                 |      |

**Ratios****5 $\alpha$ -Androstenedione:Androstenedione**

|         |                     |                     |      |                     |                     |                     |      |
|---------|---------------------|---------------------|------|---------------------|---------------------|---------------------|------|
| Q1      | Reference           | Reference           | 0.96 | Reference           | Reference           | Reference           | 0.07 |
| Q2      | 0.90 (0.38 to 2.13) | 0.86 (0.45 to 1.66) |      | 1.64 (0.62 to 4.37) | 0.45 (0.16 to 1.25) | 0.85 (0.37 to 1.96) |      |
| Q3      | 1.46 (0.56 to 3.80) | 1.07 (0.57 to 2.01) |      | 1.40 (0.53 to 3.68) | 1.31 (0.49 to 3.52) | 1.02 (0.42 to 2.50) |      |
| Q4      | 0.96 (0.36 to 2.58) | 0.94 (0.50 to 1.77) |      | 1.27 (0.49 to 3.28) | 0.36 (0.13 to 0.98) | 2.43 (0.90 to 6.57) |      |
| Q5      | 0.60 (0.19 to 1.90) | 0.80 (0.42 to 1.51) |      | 0.82 (0.30 to 2.29) | 0.86 (0.31 to 2.41) | 0.66 (0.26 to 1.66) |      |
| P trend | 0.42                | 0.49                |      | 0.41                | 0.96                | 0.68                |      |

**Unconjugated Estrone:Androstenedione**

|         |                     |                     |      |                     |                     |                      |      |
|---------|---------------------|---------------------|------|---------------------|---------------------|----------------------|------|
| Q1      | Reference           | Reference           | 0.05 | Reference           | Reference           | Reference            | 0.99 |
| Q2      | 0.91 (0.29 to 2.90) | 1.88 (0.86 to 4.08) |      | 1.28 (0.48 to 3.41) | 1.02 (0.33 to 3.11) | 1.59 (0.38 to 6.69)  |      |
| Q3      | 1.72 (0.59 to 5.03) | 3.45 (1.65 to 7.24) |      | 2.26 (0.93 to 5.53) | 1.93 (0.64 to 5.79) | 3.69 (0.94 to 14.53) |      |
| Q4      | 2.64 (0.85 to 8.14) | 1.59 (0.74 to 3.42) |      | 1.60 (0.53 to 4.80) | 0.97 (0.33 to 2.87) | 2.23 (0.62 to 7.99)  |      |
| Q5      | 1.26 (0.42 to 3.77) | 3.13 (1.49 to 6.58) |      | 2.20 (0.77 to 6.26) | 1.25 (0.40 to 3.87) | 2.73 (0.81 to 9.23)  |      |
| P trend | 0.80                | 0.02                |      | 0.19                | 0.94                | 0.35                 |      |

**DHT:Testosterone**

|         |                     |                     |      |                     |                     |                     |      |
|---------|---------------------|---------------------|------|---------------------|---------------------|---------------------|------|
| Q1      | Reference           | Reference           | 0.39 | Reference           | Reference           | Reference           | 0.63 |
| Q2      | 0.77 (0.26 to 2.33) | 0.62 (0.34 to 1.12) |      | 1.12 (0.41 to 3.07) | 0.39 (0.16 to 0.98) | 0.56 (0.23 to 1.36) |      |
| Q3      | 1.23 (0.43 to 3.52) | 0.50 (0.27 to 0.91) |      | 1.09 (0.42 to 2.78) | 0.52 (0.20 to 1.34) | 0.41 (0.17 to 0.97) |      |
| Q4      | 1.48 (0.53 to 4.14) | 0.48 (0.26 to 0.89) |      | 0.85 (0.32 to 2.24) | 0.53 (0.21 to 1.35) | 0.55 (0.22 to 1.38) |      |
| Q5      | 1.05 (0.36 to 3.12) | 0.53 (0.29 to 0.98) |      | 0.53 (0.19 to 1.46) | 0.83 (0.32 to 2.20) | 0.48 (0.20 to 1.18) |      |
| P trend | 0.65                | 0.03                |      | 0.15                | 0.98                | 0.14                |      |

**Unconjugated Estradiol:Testosterone**

|         |                      |                     |      |                      |                     |                     |      |
|---------|----------------------|---------------------|------|----------------------|---------------------|---------------------|------|
| Q1      | Reference            | Reference           | 0.64 | Reference            | Reference           | Reference           | 0.23 |
| Q2      | 1.54 (0.35 to 6.75)  | 1.33 (0.66 to 2.69) |      | 1.19 (0.51 to 2.81)  | 1.37 (0.44 to 4.29) | 0.32 (0.04 to 2.82) |      |
| Q3      | 1.78 (0.41 to 7.66)  | 1.46 (0.74 to 2.88) |      | 1.52 (0.61 to 3.78)  | 1.17 (0.39 to 3.52) | 0.51 (0.08 to 3.36) |      |
| Q4      | 3.95 (0.91 to 17.14) | 1.61 (0.83 to 3.13) |      | 4.31 (1.46 to 12.74) | 1.62 (0.57 to 4.57) | 0.52 (0.08 to 3.26) |      |
| Q5      | 3.49 (0.81 to 15.05) | 2.80 (1.39 to 5.63) |      | 1.41 (0.46 to 4.29)  | 2.29 (0.71 to 7.37) | 1.16 (0.19 to 6.97) |      |
| P trend | 0.12                 | 0.003               |      | 0.33                 | 0.13                | 0.01                |      |

Unconditional logistic regression models for each androgen/metabolite were used and adjusted for gravidity, smoking status, body mass index (age stratified models), duration of oral contraceptive use, and age at menarche and additionally adjusted for matching factors: age at baseline (age and BMI stratified models), year of blood draw, race/ethnicity, time since last menopausal hormone therapy use

\*Chi-square P values from the cross-product interaction terms between the modifiers of interest and hormone exposures

tP for trend across quintiles of a given hormone/metabolite
